# Supplementary material
Source: PubMed Central journal article supplement (PMC2829246)
Supplement: NIHMS166337-supplement-01.pdf [file NIHMS166337-supplement-01.pdf]

**SI Table 1.** Effect of mutations in the P protein subunit on the affinity of *B. subtilis* RNase P holoenzyme for G(-4) pre-tRNA<sup>Asp</sup>.

| Protein   | $K_{D, obs}$ (nM) <sup>a</sup>             |                        |
|-----------|--------------------------------------------|------------------------|
|           | 3.5 mM<br>[Ca <sup>2+</sup> ] <sub>f</sub> | Protein /<br>Wild type |
| Wild Type | 11 ± 3                                     | 1                      |
| K12C      | 61 ± 8                                     | 6                      |
| D15C      | 9 ± 3                                      | 1                      |
| F16C      | 285 ± 60                                   | 25                     |
| F20C      | > 300                                      | > 27                   |
| S25C      | 14 ± 6                                     | 1                      |
| A27C      | 50 ± 18                                    | 5                      |
| V32C      | 65 ± 15                                    | 6                      |
| Q38C      | 12 ± 5                                     | 1                      |
| R45C      | 120 ± 60                                   | 11                     |
| S49C      | 150 ± 50                                   | 14                     |
| S51C      | 85 ± 15                                    | 8                      |
| A57C      | 12 ± 3                                     | 1                      |
| R62C      | 110 ± 10                                   | 10                     |
| R68C      | > 300                                      | > 27                   |
| A70C      | 20 ± 7                                     | 1                      |
| I86C      | 105 ± 35                                   | 10                     |
| R88C      | 25 ± 8                                     | 1                      |

<sup>a</sup> Conditions: 50 mM MES, 50 mM Tris, pH 6.0, 37°C, indicated [Ca<sup>2+</sup>]<sub>f</sub>. [KCl] was adjusted to maintain ionic strength as described in Materials and Methods.
